# Supplementary material for: Fabrication of a PCN/BiOBr 2D hybrid with improved photocatalytic performance of 2,4-dichorophenol degradation
Source: Royal Society of Chemistry journal article supplement (doi:10.1039/d3ra08028e), 2024-01-01
Supplement: d3ra08028e1.pdf [file d3ra08028e1.pdf]

## Fabrication of PCN/BiOBr 2D-hybrid with improved photocatalytic performance of 2,4-dichlorophenol degradation

Shuangying Chen; Fushui Guo; Liantao Hao; Xuliang Zhang\*

Analysis and Testing Center, Shandong University of Technology, Zibo, 255000, PR China

E-mail: Zhangxl@sdut.edu.cn (Xuliang Zhang)

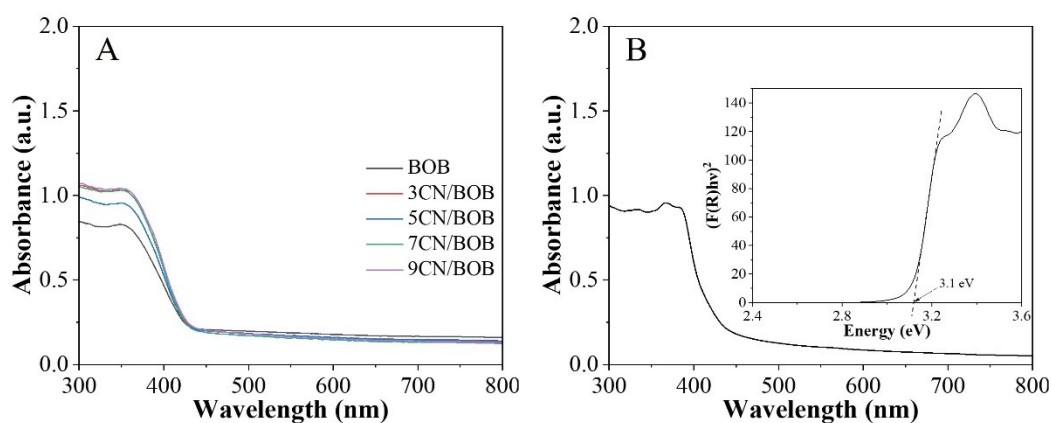

**Figure S1.** (A) UV-vis DRS results of pure BiOBr and XCN/BOB samples, (B) UV-vis DRS results and Kubelka-Munk plot of PCN.

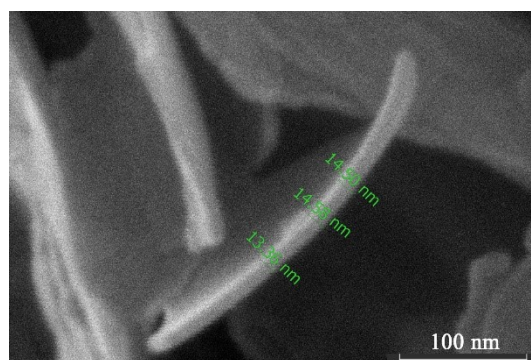

**Figure S2.** Thickness measurement of the BiOBr by SEM.

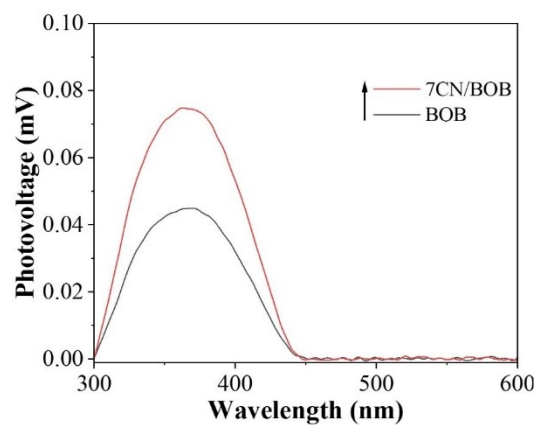

**Figure S3.** SPS results of pure BiOBr and 7CN/BOB samples.

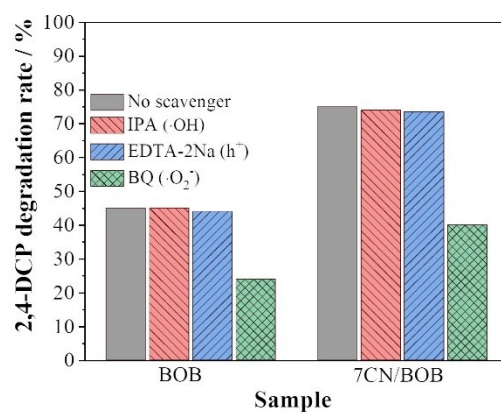

**Figure S4.** Photocatalytic degradation rates of 2,4-DCP in the presence of IPA, BQ and EDTA-2Na after irradiation for 1 h over different samples.
